# Supplementary material for: Quantitative infrapatellar fat pad signal intensity alteration as an imaging biomarker of knee osteoarthritis progression
Source: PubMed Central journal article supplement — RMD Open. 2023 Jan 25;9(1):e002565. doi: 10.1136/rmdopen-2022-002565 (PMC9884854; doi:10.1136/rmdopen-2022-002565), 2023-01-25
Supplement: rmdopen-2022-002565supp001.pdf [file rmdopen-2022-002565supp001.pdf]

**Supplementary Table 1** Baseline characteristics of participants in each group\*

| Variable                            | Group 1 (n = 194)               | Group 2 (n = 103)               | Group 3 (n = 103)               | Group 4 (n = 200)                |
|-------------------------------------|---------------------------------|---------------------------------|---------------------------------|----------------------------------|
| Age, years                          | 62.04 ± 8.80                    | 63.14 ± 8.35                    | 59.19 ± 8.70                    | 61.46 ± 9.13                     |
| Female, number (%)                  | 110 (56.70)                     | 46 (44.66)                      | 67 (65.05)                      | 130 (65.00)                      |
| BMI, kg/m <sup>2</sup>              | 30.73 ± 4.77                    | 30.72 ± 4.66                    | 30.05 ± 5.01                    | 30.52 ± 4.77                     |
| Race, White, %                      | 155 (79.90)                     | 91 (88.35)                      | 74 (71.84)                      | 155 (77.50)                      |
| K/L grade 1/2/3, number (%)         | 24/84/86<br>(12.37/43.30/44.33) | 14/47/42<br>(13.59/45.63/40.78) | 13/61/29<br>(12.62/59.22/28.16) | 24/114/62<br>(12.00/57.00/31.00) |
| WOMAC pain score                    | 10.15 ± 12.98                   | 16.50 ± 19.83                   | 9.61 ± 13.32                    | 12.95 ± 16.14                    |
| Pain medication use, number (%)     | 63 (32.47)                      | 22 (21.36)                      | 37 (35.92)                      | 55 (27.50)                       |
| Minimum medial radiographic JSW, mm | 3.79 ± 1.39                     | 3.77 ± 1.19                     | 3.93 ± 1.02                     | 3.86 ± 1.01                      |

\* Values are the mean ± SD except for numbers and percentages.

Group 1 were knees with both radiographic and pain progression; Group 2 were knees with radiographic progression but not pain progression; Group 3 were knees with pain progression but not radiographic progression; Group 4 were knees with neither radiographic progression nor pain progression.

OA = osteoarthritis; BMI = body mass index; K/L = Kellgren/Lawrence; WOMAC = Western Ontario and McMaster Universities Osteoarthritis Index; JSW = joint space width.
